# Supplementary material for: An evaluation of the feasibility, value and impact of using participatory modelling to inform the development of a regional system dynamics model for youth suicide prevention.
Source: Research Square preprint supplement (doi:10.21203/rs.3.rs-5313398/v1), 2024-10-28
Supplement: Supplementary file 1 [file 1e92cbca0d421e726047e12a.docx]

Table 3. Thematic framework

| **Themes** | **Sub-themes** | **Descriptor** |
| --- | --- | --- |
|  | Improving diversity and cultural representation within expert stakeholder group | Ensuring diversity and cultural representation among stakeholders is important if the project is to address the needs of local communities. |
| **Ways to facilitate effective stakeholder working** |  |  |
|  | Facilitative leadership in managing power and social dynamics within stakeholder group | The impact of "*loud voices"* trying to lead the discussion and the role of facilitative leadership in managing power dynamics. |
|  |  |  |
|  | Improving inclusivity and accessibility of technical aspects of modelling | Lack of translations of technical aspects of modelling a potential barrier to inclusivity and meaningful involvement of stakeholders |
|  |  |  |
| **Benefits of stakeholder engagement** | The role of lived experience in informing the participatory modelling approach | Lived experience offers context and learning when building systems model. Transparency in how experiential knowledge is used in the model building process enables trust. |
|  | Sharing and exchanging of knowledge | Process of collaborative learning helps to connect knowledge across the expert stakeholder group and foster in-depth understanding of the system. |
|  |  |  |
| **Changes to model following stakeholder feedback** | Stakeholder insight informing model structure and logic. | Stakeholders’ unique knowledge on how the local system operates informs model structure and tests model logic. |
|  | Identification of interventions and policies of interest for testing | Professional and experiential knowledge helps identify weaknesses in the system and ways the system could be optimised through different policies or scenarios. |
|  |  |  |
