# Supplementary material for: An evaluation of the feasibility, value and impact of using participatory modelling to inform the development of a regional system dynamics model for youth suicide prevention.
Source: Research Square preprint supplement (doi:10.21203/rs.3.rs-5313398/v1), 2024-10-28
Supplement: Supplementary file 2 [file 7f107754f503449590ce814b.docx]

| **ID** | **Category** | **Age** | **Gender** | **Sex assigned at birth** | **Education** | **Employment** | **Workshop 1** | **Workshop 2** | **Workshop 3** | **One-to-one consultations** |
| --- | --- | --- | --- | --- | --- | --- | --- | --- | --- | --- |
| YP4 | Young person with lived experience | 24 | F | F | Not in education | PT paid |  |  | √ |  |
| YP3 | Young person with lived experience | 21 | F | F | FT1 (HE)2 | Casual paid |  | √ | √ |  |
| YP1 | Young person with lived experience | 23 | M | M | PT education (TAFE)3 | Unemployed | √ | √ | √ |  |
| YP2 | Young person with lived experience | 19 | M | F | FT (HE) | Casual paid |  | √ |  |  |
| SP/C_F_1 | Policymaker/Commissioner | 36 | F | F | Not in education | PT paid | √ | √ | √ | √ |
| PM/C_M_1 | Policymaker/Commissioner | 44 | M | M | Not in education | FT paid | √ |  | √ |  |
| SF1 | Family member/carer | 27 | Prefer not to say | F | Not in education | Casual paid |  | √ |  |  |
| CF1 | Family member/carer | 65 | F | F | Not in education | PT paid | √ | √ |  |  |
| CF2 | Family member/carer | 54 | F | F | Not in education | PT paid | √ | √ |  |  |
| CL_M_1 | Consultant psychiatrist (youth mental health focus) | 58 | M | M | Not in education | FT paid | √ |  |  | √ |
| CL_F_2 | Senior mental health clinician | 33 | F | F | Not in education | FT paid | √ | √ | √ |  |
| AHM1 | Counselling and mental health professional | 40 | M | M | Not in education | FT paid | √ | √ | √ |  |
| CL_M_2 | Emergency medicine doctor | 45 | M | M | Not in education | FT paid | √ |  |  | √ |

1 Full-time; 2Higher education; 3 Technical and Further Education
