# Supplementary material for: An evaluation of the feasibility, value and impact of using participatory modelling to inform the development of a regional system dynamics model for youth suicide prevention.
Source: Research Square preprint supplement (doi:10.21203/rs.3.rs-5313398/v1), 2024-10-28
Supplement: Supplementary file 3 [file df4a6eb45ed94bb3fcf9fa6f.docx]

Table 5. SEYMOUR participatory systems modelling CMO framework.

| **CONTEXT**   - Primary partner agency’s local priorities closely aligned with modelling project aims → improving suicide prevention for young people in North-West Melbourne. - Royal Commission into Victoria’s Mental Health System – implementation of recommendations and development of government-wide approach to suicide prevention. - Stakeholder characteristics:   Mix of professional roles and experiential knowledge:   - Young people with lived experience - Families - Regional and state-level suicide prevention policymakers, commissioners - Mental health clinicians, counsellors, emergency medicine doctors - Organisation characteristics where project took place: - A not-for-profit company limited by guarantee. - Approved research institute - Delivers specialist clinical care to young people aged 12-25 with mental health difficulties in North-West Melbourne | **MECHANISMS**   1. **Pre-project activities**   *Establishing drivers and motives for taking part:*   - Feeling passionate about improving suicide prevention in the region. - Altruism - helping others through own lived experience. - Shared vision among young people and other stakeholders.   *Addressing concerns to ensure continued engagement*:   - Giving young people enough notice about upcoming workshops - Sending young people agenda and broad topics to help them prepare. - Youth advocate to support young people during PSM. - Acknowledging role of lived and living experience throughout PSM. - Co-creating safety protocols tailored to young people’s needs.  1. **Model building workshops**   *Workshops and time investment:*   - Three workshops (one hybrid and two in-person) with average duration of 5-6 hours over a 5-month period. - Expert stakeholder group involved in the development of conceptual map, identification of data gaps, facilitating data access, identifying policy levels and interventions for testing. - Modelling team designed stock and flow diagram.   *Logistics:*   - Materials: butcher’s paper on wall surface, coloured post-it notes for each stakeholder category, PowerPoint slides, coloured pens, whiteboard. - Workshops took place on the organisation’s premises.   *Process of eliciting stakeholder knowledge:*   - A simple diagram was used as a prompt for small group discussions. - Group process techniques included small group discussions, larger facilitated discussions, brainstorming, voting exercise. - Knowledge elicitation followed established protocol (Freebairn et al, 2022).   *Facilitative leadership:*   - Clear ground rules guiding PSM. - Managing dynamics of power e.g., acknowledging and validating all voices in the room, reiterating the importance of working as a group, ensuring conversations are respectful, repeating aims of task. - Demonstrating how stakeholder feedback is taken into consideration– transparency in how professional knowledge and experiential knowledge is incorporated the model. - Facilitating group discussions using guided questions and prompts - Ensuring circular flow of knowledge i.e., checking and clarifying stakeholders' understanding - Empowering participation by highlighting shared vision.   *Creating a safe space for lived experience involvement:*   - Working collaboratively with young people to implement safety procedures e.g., having tailored wellness plans and a project risk mitigation strategy. - Designated quiet space for a break. - Appropriate training and supervision for research team. - Youth advocate to support young people. - Having dedicated time during workshops for young people to share their views.   *Creating and sustaining inclusivity*   - Using accessible communication methods e.g., brief slideshows, charts. - Allowing flexibility in how stakeholders are involved.  1. **Post-workshop activities**   *Soliciting and enacting feedback*   - Evaluation questionnaires after each workshop - Demonstrating how feedback was enacted | **OUTCOMES** |
| --- | --- | --- |
| 1. **Individual level**  - Building trust in relationships between research team and expert stakeholder group. - Improved learning of system through knowledge sharing.  1. **Group level**  - Shared vision of problem and commitment to action. - Shared language - understanding of other stakeholders. - Forming connections between stakeholders to improve coordination (and reduce fragmentation).  1. **Project level**  - Informing model structure and logic - Identification of policy levers and prioritisation of interventions for testing. - Ensuring model face validity - Facilitating data access for model calibration and validation |
