# Supplementary material for: An evaluation of the feasibility, value and impact of using participatory modelling to inform the development of a regional system dynamics model for youth suicide prevention.
Source: Research Square preprint supplement (doi:10.21203/rs.3.rs-5313398/v1), 2024-10-28
Supplement: Supplementary file 4 [file e5905b8ec0fd5eb2fd9875f2.docx]

|  |  |  | **Data collection methods** | | |
| --- | --- | --- | --- | --- | --- |
|  |  |  | **Pre-workshop activities** | **Model building workshops** | **Post-workshop evaluation** |
| **Evaluation category** | **Evaluation Question** | **Level** | **Briefing questionnaires** | **Field notes / consultations** | **Debriefing questionnaires** |
| **FEASIBILITY** | *Is it feasible to recruit all necessary stakeholder perspectives in the PSM process?* | Project |  | X | X |
| *How were power relationships managed?* | Group |  | X | X |
| *Did all participants contribute and engage during the PSM process (e.g., inclusive, accessible, and transparent)?* | Group |  | X | X |
| **VALUE** | *How did the PSM process add value to developing the systems models?* | Project |  | X | X |
| *What are the facilitators and barriers to developing systems models through participatory methods?* | Project | X |  | X |
| *What are the experiences (e.g., benefits and challenges) arising from the application of PSM (e.g., positive outcomes and ability to share personal stories)?* | Individual |  | X | X |
| **IMPACT** | *How was feedback considered throughout the program to improve the PSM process (including the build of the systems model)?* | Project | X | X | X |

Table 1. SEYMOUR evaluation plan and data collection methods
