# Supplementary material for: An evaluation of the feasibility, value and impact of using participatory modelling to inform the development of a regional system dynamics model for youth suicide prevention.
Source: Research Square preprint supplement (doi:10.21203/rs.3.rs-5313398/v1), 2024-10-28
Supplement: Supplementary file 5 [file eec21dcd62aef2a022541019.docx]

Table 4. Synthesis of PSM evaluation findings

|  |  |  | **Data Collection Method** | | |
| --- | --- | --- | --- | --- | --- |
| **Evaluation**  **category** | **Evaluation Question** |  | **Briefing Qs** | **Field notes/ consultations** | **Debriefing Qs** |
| **FEASIBILITY** | *Is it feasible to recruit all necessary stakeholder perspectives in the PSM process?* | Lack of cultural representation within stakeholder team |  | X | X |
| *How were power relationships managed?* | Facilitative leadership |  | X | X |
| *Did all participants contribute and engage during the PSM process (e.g., inclusive, accessible, and transparent)?* | Improving inclusivity and accessibility of technical aspects of modelling |  | X | X |
| **VALUE** | *How did the PSM process add value to developing the systems models?* | - The role of lived experience in informing the PSM |  | X | X |
| - Sharing and exchanging of knowledge |  | X |  |
| *What are the facilitators and barriers to developing systems models through participatory methods?* | Barriers   - Practical challenges (e.g., time commitment) | X |  | X |
| - Anxiety about being among others perceived to be more “powerful” | X |  |  |
| Facilitators   - Logistics (e.g., venue, format, sharing workshop agenda in advance) | X |  | X |
| - Presence of youth advocate | X |  |  |
|  | - Wellness plan for young people |  |  | X |
|  | - Facilitative leadership |  |  | X |
| *What are the experiences (e.g., benefits and challenges) arising from the application of PSM (e.g., positive outcomes and ability to share personal stories)?* | Benefits:   - Ability to draw upon own experience to inform model. |  | X | X |
| - Transparency in how experiential knowledge is considered can facilitate trust |  | X |  |
| - Shared goal and commitment to action |  |  | X |
| - Stakeholders being encouraging and validating |  |  | X |
| Challenges:   - Topic of suicide uncomfortable but not distressing - Invalidation of lived experience by some stakeholders |  |  | X |
|  | X | X |
| **IMPACT** | *How was feedback considered throughout the program to improve the PSM process (including the build of the systems model)?* | - Stakeholder insight informing model logic and structure |  | X |  |
| - Identification of interventions/ policies for testing |  | X |  |
| - Suggestions for improving stakeholder diversity |  | X | X |
| - Suggestions for ensuring young people’s continued involvement | X |  | X |
| - Ensuring face validity (using structured walkthrough with stakeholders to determine accuracy) |  | X |  |
| - Identification of data gaps and negotiation for data access |  | X |  |
